# Supplementary material for: Operation range extensionviahot-spot control for catalytic CO2methanation reactors
Source: Royal Society of Chemistry journal article supplement (doi:10.1039/c9re00147f), 2019-01-01
Supplement: c9re00147f6.pdf [file c9re00147f6.pdf]

# Operation Range Extension via Hot Spot Control for Fixed-Bed CO<sub>2</sub> Methanation Reactors

Jens Bremer<sup>a</sup> and Kai Sundmacher<sup>a,b</sup>

<sup>a</sup>Max Planck Institute for Dynamics of Complex Technical Systems, Sandtorstraße 1, 39106  
Magdeburg, Germany

<sup>b</sup>Otto-von-Guericke University, Universitätsplatz 2, 39106 Magdeburg, Germany

April 15, 2019

## A Supplementary Material

### A.1 Heat transport correlations

#### Jacket

The heat transport coefficient for the reactor jacket  $k_{\text{jac}}$  in eqn (15) is obtained via

$$k_{\text{jac}} = \left( \frac{1}{\lambda_{\text{jac}}} \ln((R + \delta_{\text{jac}})/R) \right)^{-1},$$

to compensate radial mismatch between inner and outer jacket surface. Its impact on the overall heat transport is illustrated in [Fig. A.6](#).

#### Cooling channel

The heat transport inside the cooling channel (considered as an annular gap) is calculated via the correlations from Gnielinski [[Gni10](#)]. As heat transfer medium we selected the synthetic oil *Marlotherm SH* and used the corresponding thermo-physical properties as described in [[Pre10](#)]. [Fig. A.1](#) illustrates our results for the coolant Nusselt number over a broad coolant Reynolds number range and for different technically relevant coolant temperatures.

Furthermore, we assume technically relevant values for coolant velocity and hydraulic cooling channel diameter as:

$$v_{\text{cool}} = 1 - 2 \frac{\text{m}}{\text{s}} \quad \text{and} \quad d_h = 0.01 - 0.02 \text{ m}.$$

The resulting cooling regime in [Fig. A.1](#) relevant for our study is shaded in red. Consequently, two limiting cases can be identified to estimate a reasonable range for the coolant heat transfer coefficient  $\alpha_{\text{cool}}$ :

Max. case:

|                     |      |     |                            |     |     |
|---------------------|------|-----|----------------------------|-----|-----|
| $T_{\text{cool}} =$ | 573  | K   | $\Delta p_{\text{cool}} =$ | 0.3 | bar |
| $d_h =$             | 0.02 | m   | $\dot{V}_{\text{cool}} =$  | 2.1 | l/s |
| $v_{\text{cool}} =$ | 2    | m/s |                            |     |     |

$$\begin{aligned} \text{Re}_{\text{cool}} &= 8.9 \times 10^4 \Rightarrow \text{Nu}_{\text{cool}} = 560 \\ \Rightarrow \alpha_{\text{cool}} &= 2632 \frac{\text{W}}{\text{m}^2 \text{K}}, \end{aligned}$$

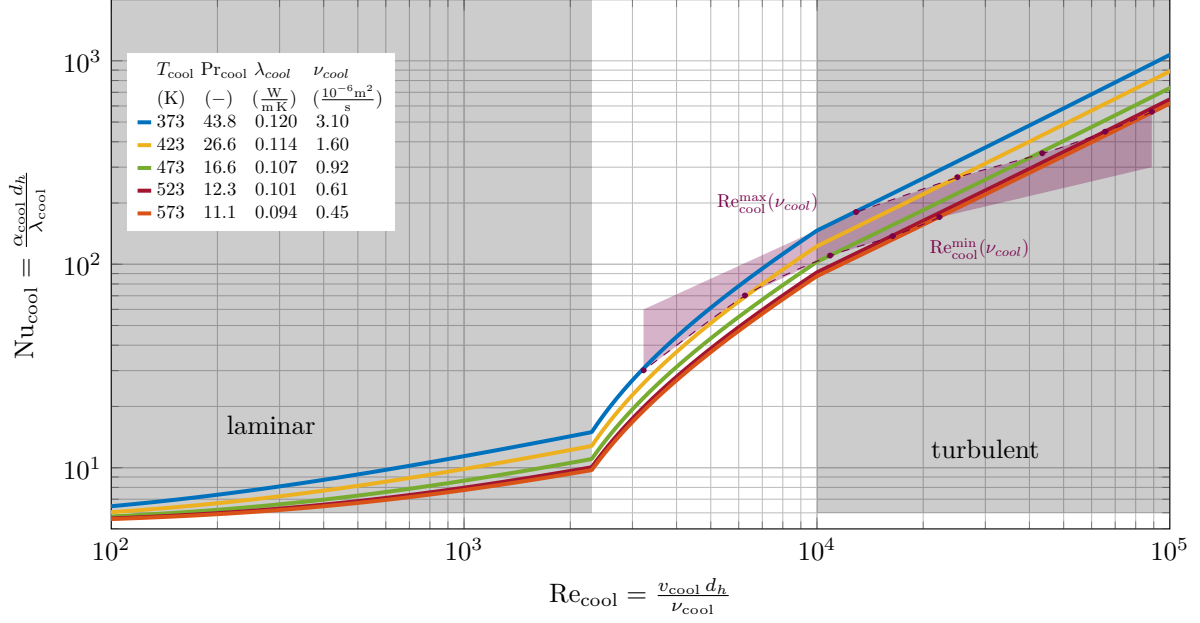

Figure A.1: Nu-Re-dependency for the heat transfer medium *Marlotherm SH*;  $d_h = 0.01 \text{ m}$  and  $L = 2.5 \text{ m}$ ; thermo-physical data from [Pre10].

Min. case:

|                     |      |     |                            |      |     |
|---------------------|------|-----|----------------------------|------|-----|
| $T_{\text{cool}} =$ | 373  | K   | $\Delta p_{\text{cool}} =$ | 0.04 | bar |
| $d_h =$             | 0.01 | m   | $\dot{V}_{\text{cool}} =$  | 0.45 | l/s |
| $v_{\text{cool}} =$ | 1    | m/s |                            |      |     |

$$\text{Re}_{\text{cool}} = 3.2 \times 10^3 \Rightarrow \text{Nu}_{\text{cool}} = 30$$

$$\Rightarrow \alpha_{\text{cool}} = 360 \frac{\text{W}}{\text{m}^2 \text{K}}.$$

Thus, the reference heat transfer coefficient  $\alpha_{\text{cool}}$  of  $500 \text{ W/m}^2 \text{K}$  used in this study is relatively moderate, so that the coolant supply is rather not a limiting factor of our proposed control approach.

## A.2 Rate expressions

The rate expressions used in our model are adapted from Xu and Froment [Xu89] and Koschany et al. [Kos16], which have been implemented via the following correlations.

### Xu and Froment

Xu and Froment [Xu89] considered three rate equations including the water-gas-shift (WGS) reaction:

$$r_1 = \frac{k_1}{p_{H_2}^{2.5}} \left( p_{CH_4} p_{H_2O} - \frac{p_{H_2}^3 p_{CO}}{K_1} \right) / \text{DEN}^2, \quad (\text{A.1})$$

$$r_2 = \frac{k_2}{p_{H_2}} \left( p_{CO} p_{H_2O} - \frac{p_{H_2} p_{CO_2}}{K_2} \right) / \text{DEN}^2, \quad (\text{A.2})$$

$$r_3 = \frac{k_3}{p_{H_2}^{3.5}} \left( p_{CH_4} p_{H_2O}^2 - \frac{p_{H_2}^4 p_{CO_2}}{K_3} \right) / \text{DEN}^2, \quad (\text{A.3})$$

where  $p_\alpha$  is the partial pressure of the respective component in bar and DEN is a dimensionless parameter defined as

$$\text{DEN} = 1 + K_{CO} p_{CO} + K_{H_2} p_{H_2} + K_{CH_4} p_{CH_4} + \frac{K_{H_2O} p_{H_2O}}{p_{H_2}}.$$

$K_\alpha$  is the respective adsorption constant for  $\text{CH}_4$ ,  $\text{CO}$ ,  $\text{H}_2\text{O}$  and  $\text{H}_2$  and  $b_\beta$  are rate coefficients exponentially depending on temperature via:

$$K_\alpha = \mathcal{A}_\alpha \exp\left(-\frac{\Delta H_\alpha}{\mathcal{R}T}\right),$$

$$k_\beta = \mathcal{A}_\beta \exp\left(-\frac{E_\beta}{\mathcal{R}T}\right).$$

$\mathcal{A}_\beta$ ,  $E_\beta$ ,  $\mathcal{A}_\alpha$ ,  $\Delta H_\alpha$  are constant kinetic parameters stated in [Tab. A.1](#).

Table A.1: Kinetic parameters for [Eqs. \(A.1\) to \(A.3\)](#); each pre-exponential factor contains a multiplier of 1.225 (see Xu and Froment [\[Xu89\]](#))

| $\alpha$ | Formula              | $\mathcal{A}_\alpha$   | $[\mathcal{A}_\alpha]$ | $\Delta H_\alpha$ | $[\Delta H_\alpha]$            | $\beta$ | $\mathcal{A}_\beta$    | $[\mathcal{A}_\beta]$                                            | $E_\beta$ | $[E_\beta]$                    |
|----------|----------------------|------------------------|------------------------|-------------------|--------------------------------|---------|------------------------|------------------------------------------------------------------|-----------|--------------------------------|
| 1        | $\text{CH}_4$        | $8.15 \times 10^{-4}$  | $\text{bar}^{-1}$      | -38.28            | $\frac{\text{kJ}}{\text{mol}}$ | 1       | $5.176 \times 10^{15}$ | $\frac{\text{kmol bar}^{0.5}}{\text{kg}_{\text{cat}} \text{ h}}$ | 240.10    | $\frac{\text{kJ}}{\text{mol}}$ |
| 2        | $\text{CO}$          | $10.08 \times 10^{-5}$ | $\text{bar}^{-1}$      | -70.65            | $\frac{\text{kJ}}{\text{mol}}$ | 2       | $2.395 \times 10^6$    | $\frac{\text{kmol}}{\text{kg}_{\text{cat}} \text{ h bar}}$       | 67.13     | $\frac{\text{kJ}}{\text{mol}}$ |
| 4        | $\text{H}_2\text{O}$ | $2.17 \times 10^{-5}$  |                        | 88.68             | $\frac{\text{kJ}}{\text{mol}}$ | 3       | $1.250 \times 10^{15}$ | $\frac{\text{kmol bar}^{0.5}}{\text{kg}_{\text{cat}} \text{ h}}$ | 243.90    | $\frac{\text{kJ}}{\text{mol}}$ |
| 5        | $\text{H}_2$         | $7.50 \times 10^{-9}$  | $\text{bar}^{-1}$      | -82.90            | $\frac{\text{kJ}}{\text{mol}}$ |         |                        |                                                                  |           |                                |

The temperature dependent equilibrium constants  $K_1$ ,  $K_2$  and  $K_3$  are based on the Gibbs reaction energy (STP) as shown in Poling et al. [\[Pol01\]](#).

Finally, a unit conversion is required to adequately implement these rate equations to eqn (4) and (5):

$$\tilde{r}_\beta = r_\beta \rho_{\text{cat}} 1000/3600.$$

### Koschany et al.

Koschany et al. [\[Kos16\]](#) exclusively considered  $\text{CO}_2$  methanation to describe they experimental kinetic data. The corresponding rate equation is:

$$r_{\text{meth}} = k p_{\text{CO}_2}^{0.5} p_{\text{H}_2}^{0.5} \left(1 - \frac{p_{\text{CH}_4} p_{\text{H}_2\text{O}}^2}{K_{\text{eq}} p_{\text{CO}_2} p_{\text{H}_2}^4}\right) / \text{DEN}^2, \quad (\text{A.4})$$

$$\text{DEN} = 1 + K_{\text{OH}} \frac{p_{\text{H}_2\text{O}}}{p_{\text{H}_2}^{0.5}} + K_{\text{H}_2} p_{\text{H}_2}^{0.5} + K_{\text{mix}} p_{\text{CO}_2}^{0.5}, \quad (\text{A.5})$$

which is determined by the following correlations for rate coefficient  $k$ , adsorption constant  $K_x$  and equilibrium constant  $K_{\text{eq}}$ :

$$k = k_{0,\text{ref}} \exp\left(\frac{E_A}{\mathcal{R}} \left(\frac{1}{T_{\text{ref}}} - \frac{1}{T}\right)\right), \quad (\text{A.6})$$

$$K_x = K_{x,0,\text{ref}} \exp\left(\frac{\Delta H_x}{\mathcal{R}} \left(\frac{1}{T_{\text{ref}}} - \frac{1}{T}\right)\right), \quad (\text{A.7})$$

$$K_{\text{eq}} = 137 T^{-3.998} \exp\left(\frac{158.7 \text{ kJ/mol}}{\mathcal{R} T}\right). \quad (\text{A.8})$$

Again, a unit conversion is required to adequately implement this rate equation to eqn (4) and (5):

$$\tilde{r}_{\text{meth}} = r_{\text{meth}} \rho_{\text{cat}} 1000.$$

Table A.2: Kinetic parameters for Eqs. (A.6) to (A.8); (see Koschany et al. [Kos16])

|                               |         |                               |
|-------------------------------|---------|-------------------------------|
| $T_{\text{ref}}$              | 550     | K                             |
| $k_{0,\text{ref}}$            | 3.46e-4 | mol/(bar s g <sub>cat</sub> ) |
| $E_A$                         | 77.5    | kJ/mol                        |
| $K_{\text{OH},0,\text{ref}}$  | 0.5     | bar <sup>-0.5</sup>           |
| $\Delta H_{\text{OH}}$        | 22.4    | kJ/mol                        |
| $K_{\text{H}_2,0,\text{ref}}$ | 0.44    | bar <sup>-0.5</sup>           |
| $\Delta H_{\text{H}_2}$       | -6.2    | kJ/mol                        |
| $K_{\text{mix},0,\text{ref}}$ | 0.88    | bar <sup>-0.5</sup>           |
| $\Delta H_{\text{mix}}$       | -10     | kJ/mol                        |

### A.3 Reference case details

In order to enable a simple replication of our results, we outline detailed information on the reference reactor setting in Table 1 and the corresponding steady state assuming a coolant temperature of  $T_{\text{cool}} = 550$  K. Furthermore, surface plots illustrate the finite volume mesh density and provide a clearer visualization of our chosen PDE discretization.

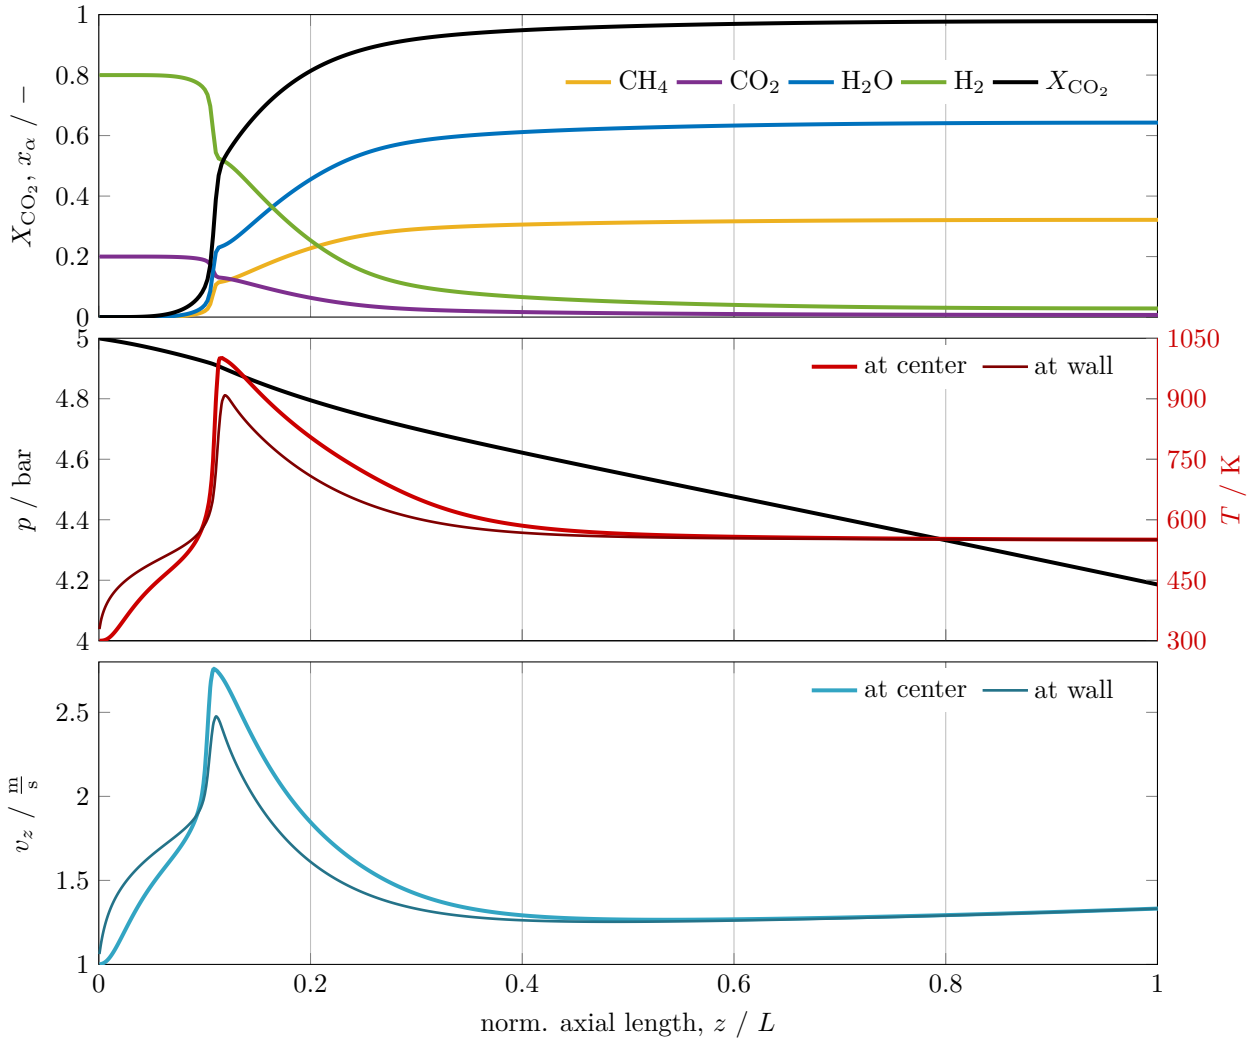

Figure A.2: Conversion, composition, temperature, pressure and velocity changes along the entire reactor length; reactor setting according to Table 1 and at  $T_{\text{cool}} = 550$  K

## Reaction

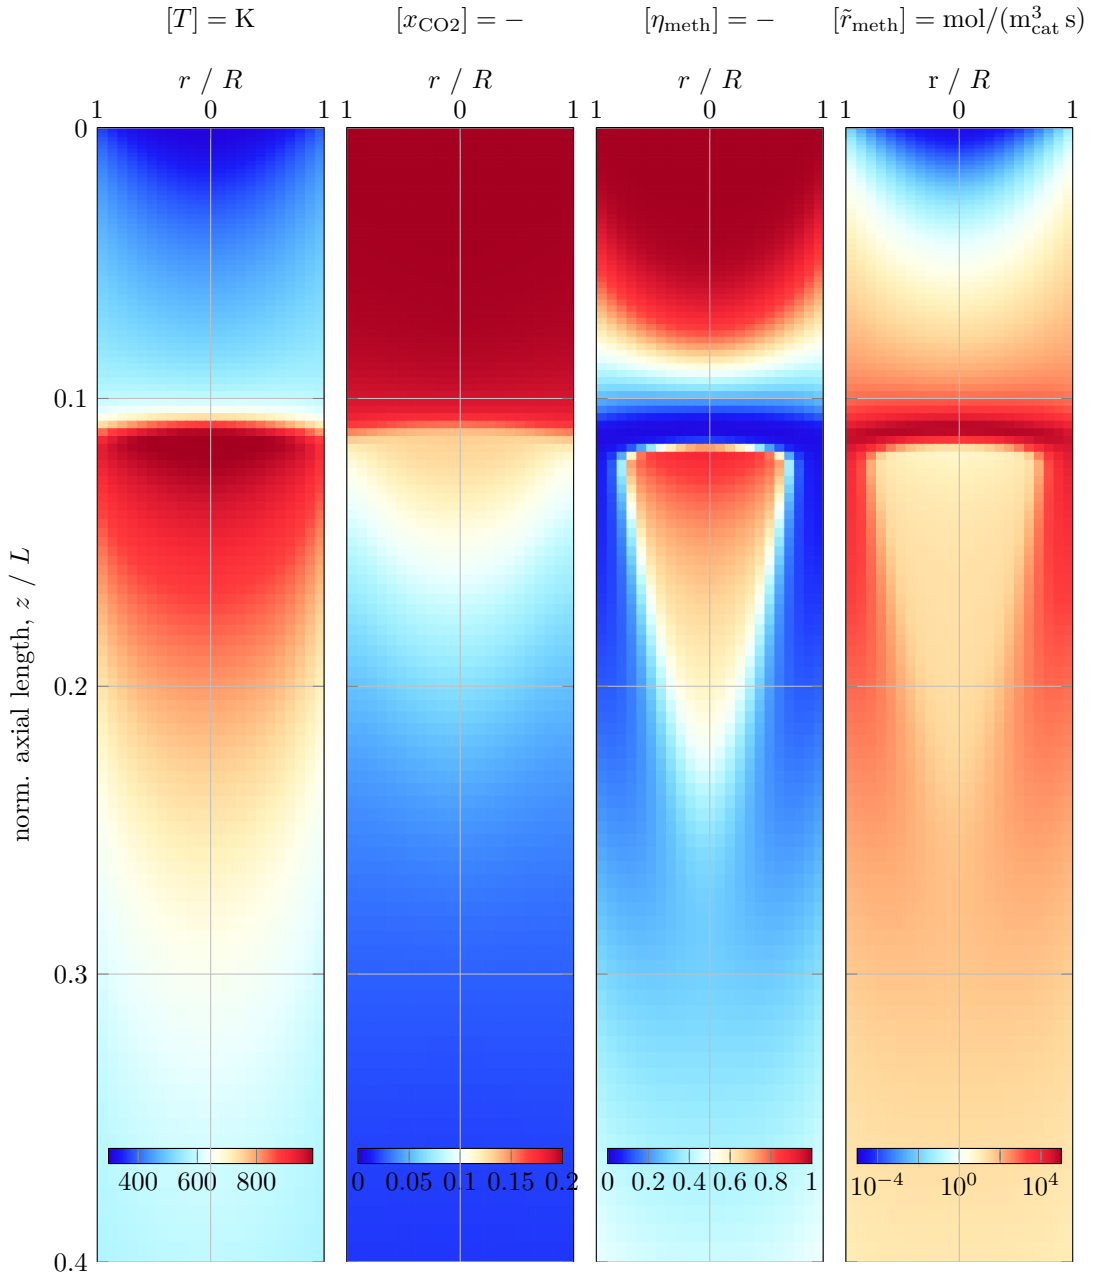

Figure A.3: Temperature,  $\text{CO}_2$ -composition, effectiveness factor and reaction rate changes around the reactive zone; reactor setting according to Table 1 and at  $T_{\text{cool}} = 550 \text{ K}$

## Heat and mass transport

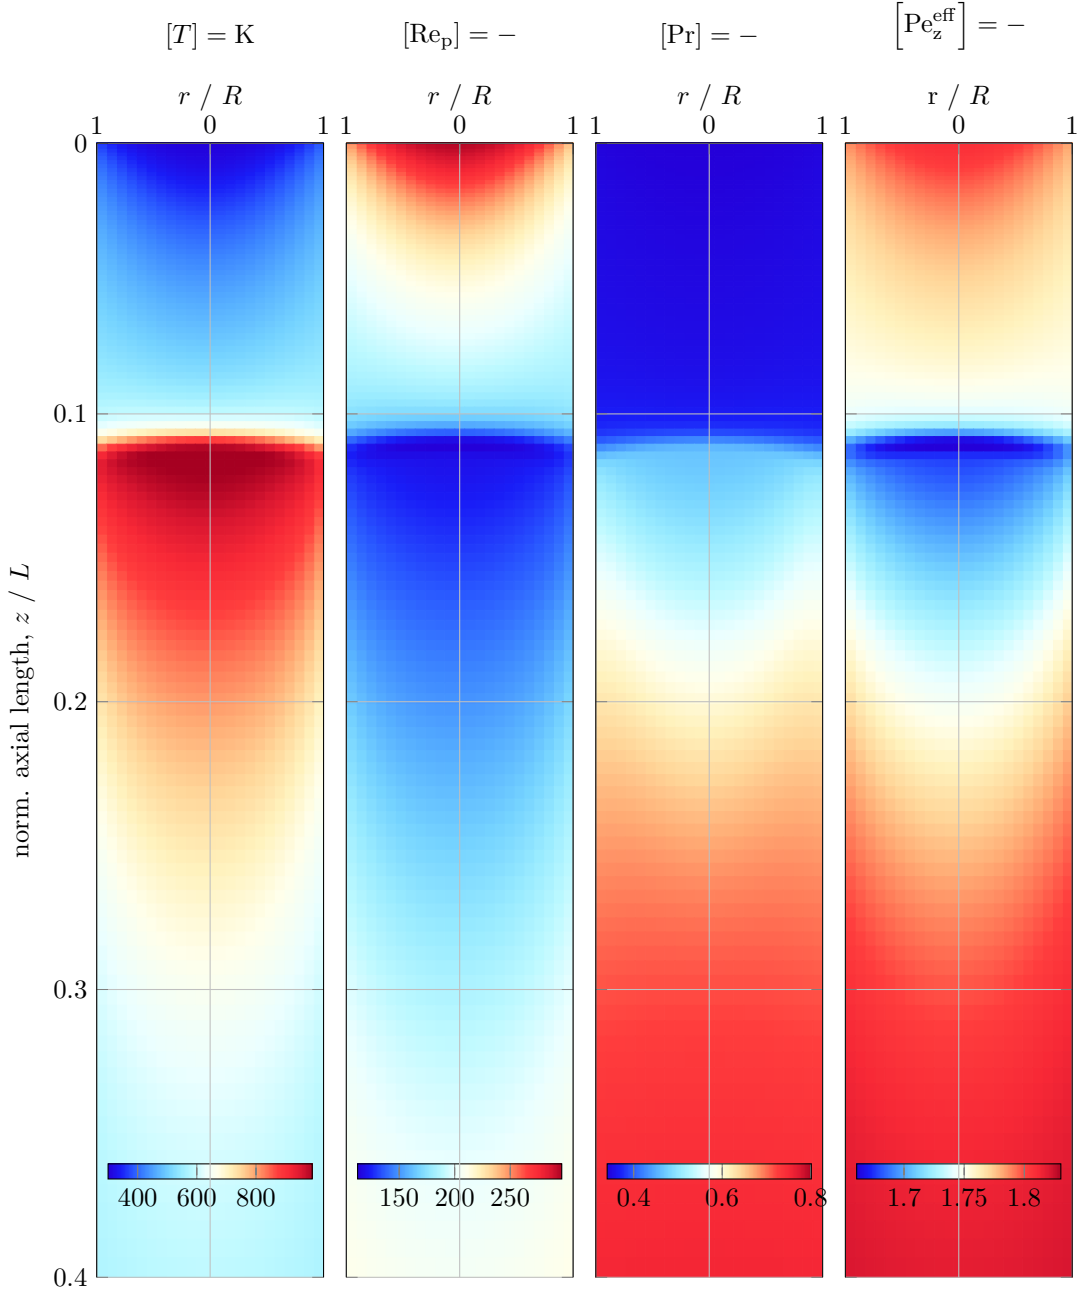

Figure A.4: Temperature, Reynolds number, Prandtl number and effective axial Péclet number around the reactive zone; reactor setting according to Table 1 and at  $T_{cool} = 550$  K

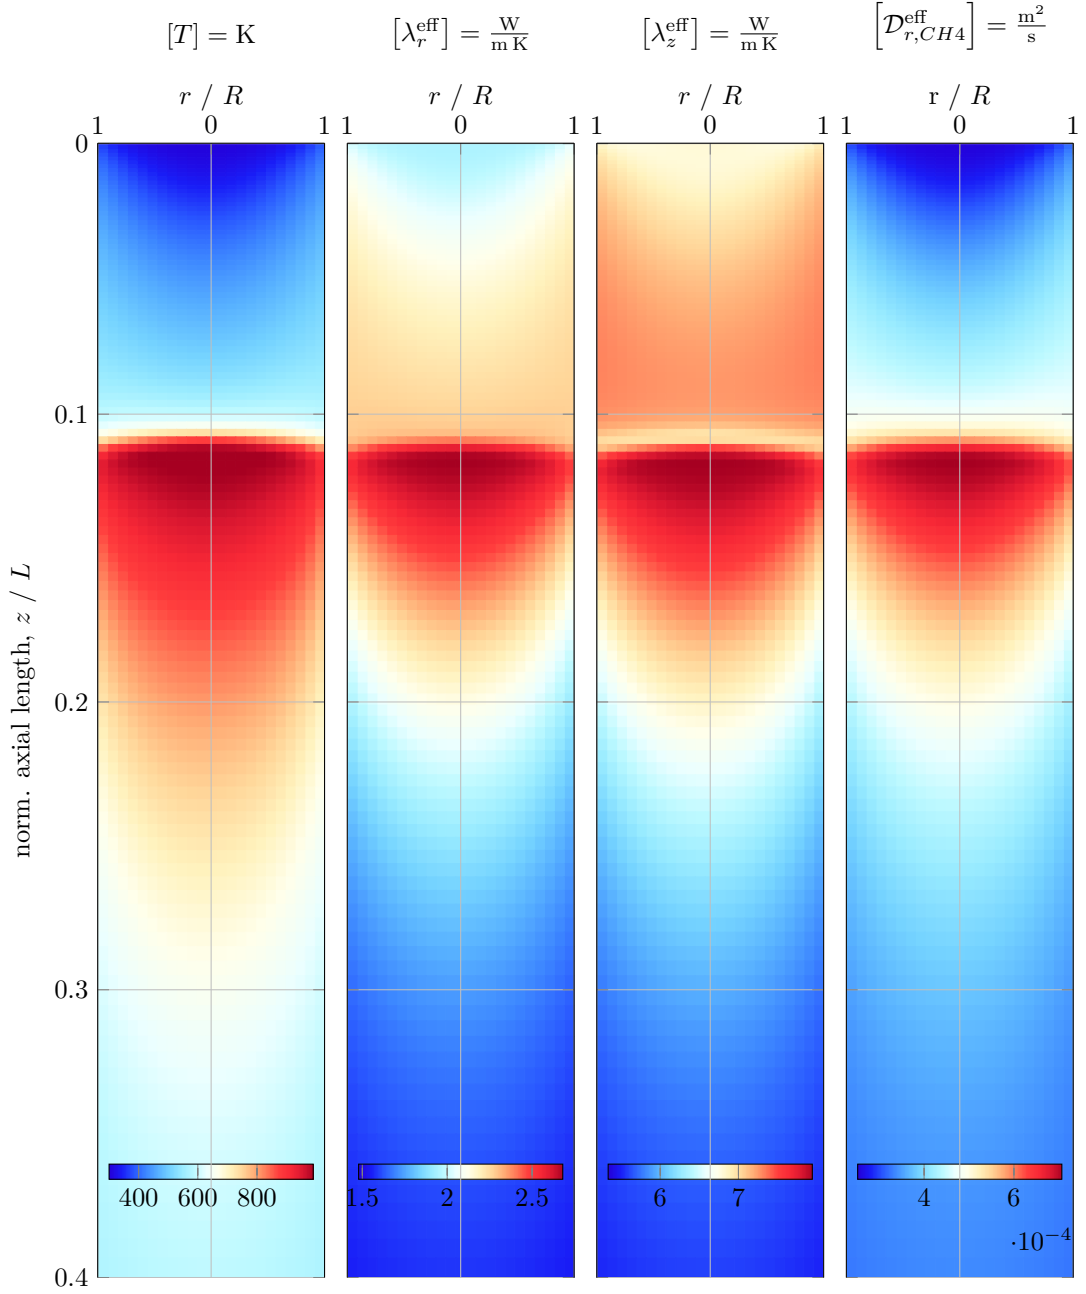

Figure A.5: Temperature, effective radial conductivity, effective axial conductivity and effective  $\text{CH}_4$  diffusion coefficient around the reactive zone; reactor setting according to Table 1 and at  $T_{\text{cool}} = 550 \text{ K}$

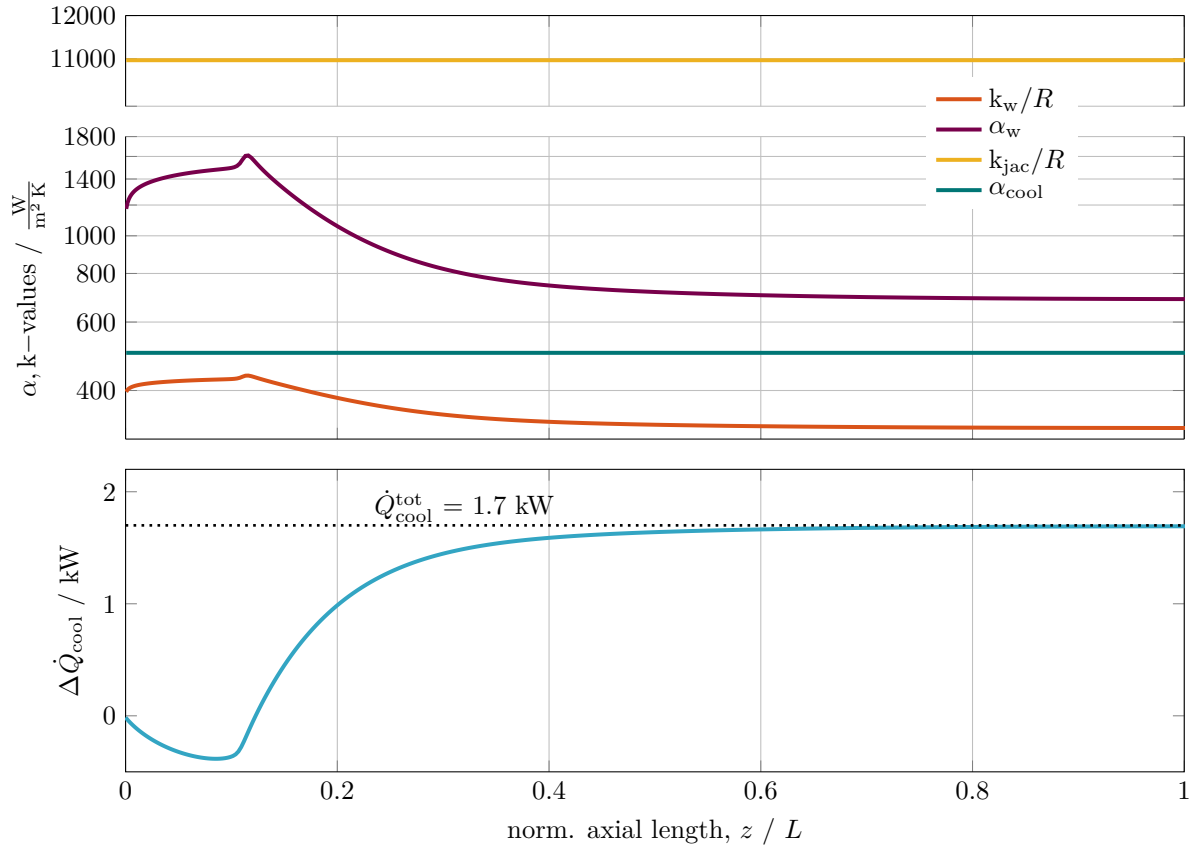

Figure A.6: Heat transport coefficients and cumulative heat transfer from reactor to coolant along the entire reactor length; reactor setting according to Table 1 and at  $T_{cool} = 550 \text{ K}$



## A.4 Influence of axial heat dispersion

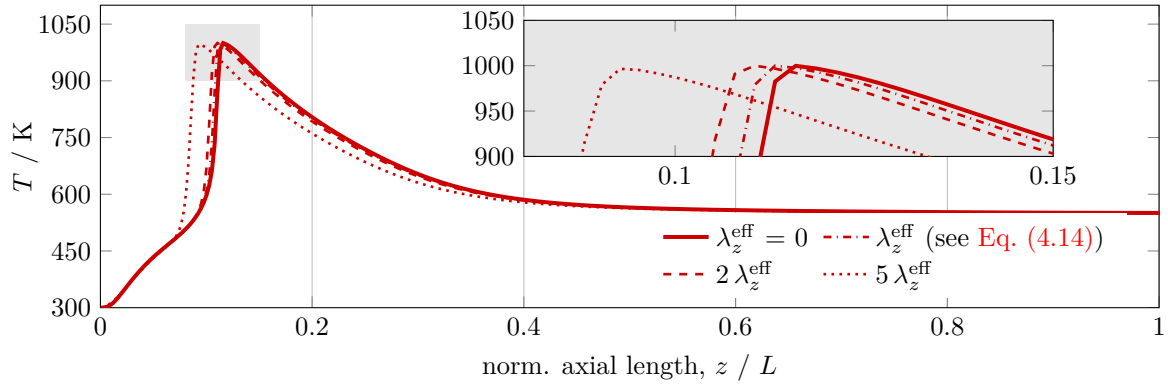

Figure A.7: Influence of axial heat dispersion on steady-state temperature profile (at center); reactor setting according to Table 1 and at  $T_{\text{cool}} = 550$  K

## References

- [Gni10] V. Gnielinski. “G2 Heat Transfer in Concentric Annular and Parallel Plate Ducts”. In: *VDI Heat Atlas*. Berlin, Heidelberg: Springer Berlin Heidelberg, 2010, pp. 701–708 (cit. on p. 1).
- [Kos16] F. Koschany et al. “On the kinetics of the methanation of carbon dioxide on coprecipitated  $\text{NiAl}(\text{O})_x$ ”. In: *Applied Catalysis B: Environmental* 181 (2016), pp. 504–516 (cit. on pp. 2–4).
- [Pol01] B. E. Poling et al. *The Properties of Gases and Liquids*. McGraw-Hill, 2001 (cit. on p. 3).
- [Pre10] E. Preisegger et al. “D4 Properties of Industrial Heat Transfer Media”. In: *VDI Heat Atlas*. Berlin, Heidelberg: Springer Berlin Heidelberg, 2010, pp. 419–512 (cit. on pp. 1, 2).
- [Xu89] J. Xu and G. F. Froment. “Methane steam reforming, methanation and water-gas shift: I. Intrinsic kinetics”. In: *AIChE Journal* 35.1 (1989), pp. 88–96 (cit. on pp. 2, 3).
